# Supplementary material
Source: PubMed Central journal article supplement (PMC3061811)
Supplement: NIHMS228111-supplement-1_si_001.pdf [file NIHMS228111-supplement-1_si_001.pdf]

**Table S1. List of BIAM reactive Cys containing peptides, identified in the LC-MS/MS analysis**

| <b>LOCUS</b> | <b>DEFINITION</b>                                             | <b>Sequence</b>         | <b>SUBCELLULAR LOCATION</b>    | <b>Source</b> |
|--------------|---------------------------------------------------------------|-------------------------|--------------------------------|---------------|
| ACO1         | Mitochondrial aconitase                                       | VGLIGSC#TNSSYEDMSR      | cytoplasm\mitochondrial matrix | 3,4           |
| ACO1         | Mitochondrial aconitase                                       | VAC#QDATAQMA            | cytoplasm\mitochondrial matrix | 3,4           |
| ACT1         | Actin                                                         | IDNGSGMC#K              | actin cable                    | 3,4           |
| ADE3         | Cytoplasmic trifunctional enzyme C1-tetrahydrofolate synthase | C#VGDVEFNEAIK           | cytoplasm\nucleus              | 1,2,3,4       |
| ADE3         | Cytoplasmic trifunctional enzyme C1-tetrahydrofolate synthase | AGQVLDGKAC#AQ           | cytoplasm                      | 1,2,3,4       |
| ADE6         | Formylglycinamide-ribonucleotide (FGAM)-synthetase            | C#QQVIDAC#              | cytoplasm                      | 1,3,4         |
| ADE6         | Formylglycinamide-ribonucleotide (FGAM)-synthetase            | GLDLC#PALGVAIPVGKDSMSMK | cytoplasm                      | 1,3,4         |
| ADE6         | Formylglycinamide-ribonucleotide (FGAM)-synthetase            | YVLGVSPQDLSIFEEIC#KR    | cytoplasm                      | 1,3,4         |
| ADH1/ADH2    | alcohol dehydrogenase activity                                | C#CSDVFNQVVK            | cytoplasm                      | 1,2,4         |

|       |                                                                                         |                          |                   |         |
|-------|-----------------------------------------------------------------------------------------|--------------------------|-------------------|---------|
| ADH3  | alcohol dehydrogenase activity                                                          | YSGVC#HTDLHAWHGDWPLPVK   | cytoplasm         | 1       |
| AHP1  | Thiol-specific peroxiredoxin                                                            | FQYIAISQSDADSESC#K       | cytoplasm         | 1,2,3   |
| ALD4  | aldehyde dehydrogenase (NAD) activity                                                   | AVQNIILGIYNSGEVC#CAGSR   | mitochondrion     | 1,2     |
| ALD5  | aldehyde dehydrogenase activity                                                         | SLFC#AR                  | mitochondrion     | 2       |
| ALD6  | Utilizes NADP+ as the preferred coenzyme                                                | AQDGKTYVEDPSTENTVC#EVSSA | cytoplasm         | 1,2,3,4 |
| ALD6  | Utilizes NADP+ as the preferred coenzyme                                                | NAGQIC#SSGSR             | cytoplasm         | 1,2,3,4 |
| ALD6  | Utilizes NADP+ as the preferred coenzyme                                                | TTEDVEYAIEC#ADR          | cytoplasm         | 1,2,3,4 |
| APE3  | Vacuolar aminopeptidase Y                                                               | C#YHQLC#DDVSNL           | vacuole           | 3       |
| APJ1  | Putative chaperone of the HSP40 (DNAJ) family                                           | LGLNRTRIC#SVCDGHGGLK     | cytoplasm\nucleus | 1       |
| ARC40 | structural constituent of cytoskeleton                                                  | FPFGC#LIR                | cytoplasm         | 1       |
| ARO4  | 3-deoxy-D-arabino-heptulosonate-7-phosphate (DAHP) synthase                             | VNDVVC#EQIANGENAITGV     | cytoplasm\nucleus | 3       |
| ARO4  | 3-deoxy-D-arabino-heptulosonate-7-phosphate (DAHP) synthase                             | DAC#IGWETTEDVLR          | cytoplasm\nucleus | 3       |
| ASC1  | WD repeat protein (G-beta like protein) that interacts with the translational machinery | GQC#LATLLGHNDWVSQVR      | cytoplasm         | 1       |
| ASN1  | Asparagine synthetase                                                                   | NLHLADC#LR               | cytoplasm         | 1,2,3   |
| ASN1  | Asparagine synthetase                                                                   | ADWGC#AEDPSGR            | cytoplasm         | 1,2,3   |

|          |                                                              |                             |                      |         |
|----------|--------------------------------------------------------------|-----------------------------|----------------------|---------|
| BAT1/2   | branched-chain-amino-acid transaminase activity              | LGANYAPC#ILPQLQAAK          | mitochondrial matrix | 2       |
| BMH1/2   | DNA Protein binding, RAS protein signal transduction         | EKSEHQVELIC#SYR             | cytoplasm            | 1       |
| BNI5     | Protein involved in organization of septins                  | LADQTPHDDNSENCPNR           | septin ring          | 1,2,3,4 |
| CDC19    | pyruvate kinase activity                                     | NC#TPKPTSTTETVAAS           | cytoplasm            | 1,2,3,4 |
| CDC19    | pyruvate kinase activity                                     | AC#DDKIMYVDYK               | cytoplasm            | 1,2,3,4 |
| CDC19    | pyruvate kinase activity                                     | NAGKIC#SHK                  | cytoplasm            | 1,2,3,4 |
| CDC19    | pyruvate kinase activity                                     | AEVSDVGNAILDGADC#VMLSGETAK  | cytoplasm            | 1,2,3,4 |
| CDC19    | pyruvate kinase activity                                     | SNLAGKPVIC#AT               | cytoplasm            | 1,2,3,4 |
| CDC55    | Non-essential regulatory subunit B of protein phosphatase 2A | QNSLC#DNK                   | nucleus              | 2       |
| CIS3     | cik1 suppressor                                              | NVAEQC#SAIHLE               | bud tip              | 3,      |
| CUP1-1/2 | Metallothionein                                              | SC#C#SGK                    | cytoplasm            | 1,2     |
| CUP1-1/2 | Metallothionein                                              | QNEGHEC#QCQCGSCK            | cytoplasm            | 1,2     |
| CYR1     | Required for START A of cell cycle,                          | QQRC#SGLEICR                | plasma membrane      | 1       |
| DAK1     | putative dihydroxyacetone kinase                             | SEPHITELDNQVGDGDC#GYTLVAGVK | cytoplasm            | 2       |
| DAP1     | damage response protein                                      | PC#IGTLIPEPGVNV             | membrane             | 3       |
| DED81    | Cytosolic asparaginyl-tRNA synthetase                        | ILAWLC#DR                   | cytoplasm            | 1       |

|        |                                                                                           |                                |                                |       |
|--------|-------------------------------------------------------------------------------------------|--------------------------------|--------------------------------|-------|
| DLD3   | D-lactate dehydrogenase                                                                   | C#DAGVVMR                      | cytoplasm                      | 3     |
| DRS1   | Nucleolar DEAD-box protein required for ribosome assembly                                 | KNLEVPVLIC#TD                  | nucleolus                      | 4     |
| DYS1   | Deoxyhypusine synthase, catalyzes formation of deoxyhypusine                              | IGNLLVPNDNYC#K                 | cytoplasm                      | 1,2,4 |
| ECM33  | GPI-anchored protein of unknown function                                                  | QSNGAIQGDSFVC#K                | plasma membrane                | 3     |
| ECM39  | Alpha-1,6-mannosyltransferase localized to the ER                                         | GIVGLTNGLSFIYLKNC#LQDMFDEITEKK | ER                             | 1     |
| EDE1   | Key endocytic protein involved in a network of interactions with other endocytic proteins | C#NWDLEAATNFLDSA               | actin cortical patch\bud neck  | 3     |
| EFT2   | translation elongation factor eEF-2 - yeast                                               | VTDGALVVVDTIEGVC#VQTETVLR      | cytoplasm                      | 1,2   |
| EMI2   | probable glucokinase                                                                      | TPFQLC#SEVLSR                  | cytoplasm                      | 1     |
| ENO1/2 | Enolase I, catalyzes the first common step of glycolysis and gluconeogenesis              | IGLDC#ASSEFFK                  | cytoplasm                      | 1,2,3 |
| EPS1   | Pdi1p (protein disulfide isomerase)-related protein                                       | IESADLC#GDENIEYFPEIRL          | endoplasmic reticulum membrane | 3     |
| ERG10  | Acetyl-CoA C-acetyltransferase (acetoacetyl-CoA thiolase),                                | IGVAAIC#NGGGGASSIVIEKI         | cytoplasm                      | 1,2   |
| ERG20  | Farnesyl pyrophosphate synthetase                                                         | DVLIPLGEYFQIQDDYLDC#FGTPEQIGK  | cytoplasm                      | 3     |
| FAS2   | Alpha subunit of fatty acid synthetase                                                    | VGNC#SGSGMGGVSALR              | fatty-acid synthase complex    | 1,3   |

|       |                                                                                      |                             |                       |         |
|-------|--------------------------------------------------------------------------------------|-----------------------------|-----------------------|---------|
| FBA1  | Fructose 1,6-bisphosphate adolase                                                    | HMLDLSEETDEENISTC#VK        | cytoplasm             | 1,2,3,4 |
| FBA1  | Fructose 1,6-bisphosphate adolase                                                    | LDTDC#QYAYLTGIR             | cytoplasm             | 1,2,3,4 |
| FBA1  | Fructose 1,6-bisphosphate adolase                                                    | GNC#HGLYAGDIA               | cytoplasm             | 1,2,3,4 |
| FBA1  | Fructose 1,6-bisphosphate adolase                                                    | EQVGC#KEEKPLFL              | cytoplasm             | 1,2,3,4 |
| FMP12 | The authentic, non-tagged protein                                                    | SMEESSKPVSVCS#              | mitochondrion         | 3       |
| FPR1  | Peptidyl-prolyl cis-trans isomerase (PPIase), binds to the drugs FK506 and rapamycin | GSPFQC#NIGVGQVIK            | cytoplasm\nucleus     | 1,2     |
| FRT1  | Exhibits physical and genetic interactions with TCP1 and FRT2                        | NC#TLLPPSFPR                | endoplasmic reticulum | 1       |
| GAS1  | Beta-1.3-glucanosyltransferase                                                       | EYGC#NEVTPR                 | plasma membrane       | 3       |
| GCN1  | Positive regulator of the Gcn2p kinase                                               | YC#IFQTTVK                  | cytoplasm             | 2       |
| GCV2  | P subunit of the mitochondrial glycine decarboxylase complex                         | LDDTYGDMNLIC#TC#PSVEEIANETE | mitochondrion         | 1,2,    |
| GIS2  | GIG3 suppressor                                                                      | C#YTCGQAGHMSR               | cytoplasm             | 3,4     |
| GIS2  | GIG3 suppressor                                                                      | SEC#TVQR                    | cytoplasm             | 3,4     |
| GIS2  | GIG3 suppressor                                                                      | NKPGHVQTDC#TMPR             | cytoplasm             | 3,4     |
| GLK1  | glucokinase                                                                          | AVDQIC#DDFEVTPEKLDELTA      | cytoplasm             | 3       |
| GLY1  | L-threonine aldolase                                                                 | HPFDC#NGPTQIY               | cytoplasm             | 1       |
| GND1  | 6-phosphogluconate dehydrogenase                                                     | PEC#ASDNLPVDK               | cytoplasm             | 1,2     |

|        |                                                                                                    |                                  |                              |     |
|--------|----------------------------------------------------------------------------------------------------|----------------------------------|------------------------------|-----|
| GPX2   | glutathione peroxidase activity                                                                    | C#QLNYGVTFPIMK                   | cytoplasm                    | 4   |
| GRS1   | glycine-tRNA ligase activity                                                                       | HFILEEDMLEVDC#TMLTPYEVLK         | cytoplasm\mitochondrion      | 1   |
| GUA1   | GMP synthase                                                                                       | AGLYNQISQAFAC#LLPVK              | N\A                          | 1   |
| HAP1   | Heme-responsive zinc finger transcription factor of the Zn(2)-Cys(6) binuclear cluster domain type | IPLSCTIC#R                       | nucleus                      | 1   |
| HEM13  | coproporphyrinogen oxidase                                                                         | C#DEYFYI                         | mitochondrial inner membrane | 3   |
| HIS1   | ATP phosphoribosyltransferase, a hexameric enzyme,                                                 | IKFVSGSVEASC#ALGIGDAIVDLVESGETMR | cell                         | 1,3 |
| HIS4   | Multifunctional enzyme containing phosphoribosyl-ATP pyrophosphatase                               | C#FGEFKHGLVGLESLLK               | cell                         | 3   |
| HIS4   | Multifunctional enzyme containing phosphoribosyl-ATP pyrophosphatase                               | QC#KEIVFASPPR                    | cell                         | 3   |
| HIS4   | Multifunctional enzyme containing phosphoribosyl-ATP pyrophosphatase                               | C#LGLVYSSK                       | cell                         | 3   |
| HIS5   | Histidinol-phosphate aminotransferase                                                              | C#LGVGSDESIDAIIRACCVPGKEK        | cell                         | 4   |
| HOM2   | Aspartic beta semi-aldehyde dehydrogenase,                                                         | HTEC#ISLR                        | cytoplasm\ nucleus           | 3   |
| HXK1/2 | Hexokinase isoenzyme 1                                                                             | C#EYGSFDNEHLVLPR                 | cytoplasm                    | 3,4 |
| HXK2   | Hexokinase isoenzyme 2                                                                             | YDVC#SDIEKLQ                     | cytoplasm\nucleus            | 3,4 |

|       |                                                             |                          |                             |       |
|-------|-------------------------------------------------------------|--------------------------|-----------------------------|-------|
| HYP2  | Translation initiation factor eIF-5A                        | DAGSSATYPMQC#SALR        | cytoplasm\ ribosome         | 3     |
| HYR1  | glutathione peroxidase activity                             | SKC#GFTPQYKEALYKR        | cytoplasm                   | 3,4   |
| IDI1  | Isopentenyl diphosphate:dimethylallyl diphosphate isomerase | SSETSNDSEGETC#FSGHDEEQIK | cytoplasm                   | 1     |
| IDP1  | isocitrate dehydrogenase (NADP+) activity                   | RGELDNTPALC#K            | mitochondrion               | 1     |
| ILV5  | Acetohydroxyacid reductoisomerase                           | C#LMGGIHGMF              | mitochondrion               | 1,4   |
| PDI1  | protein disulfide-isomerase                                 | KDVLVLYAPWC#GHCK         | cytoplasm                   | 1,2   |
| KRE11 | molecular_function unknown                                  | C#DLDGSNIEQLR            | TRAPP                       | 2     |
| LYS7  | copper chaperone for SOD1                                   | QVC#AC#TGK               | cytoplasm                   | 1,2   |
| MAP1  | methionine aminopeptidase                                   | TYC#GHGVGEFFHCSPNIPHYAK  | cytosolic ribosome          | 1     |
| MPD1  | Disulfide isomerase related protein                         | APWC#GHCK                | vacuole                     | 1     |
| MSL5  | branchpoint bridging protein                                | KIPNIQGIVC#K             | commitment complex          | 2     |
| MSU1  | Protein essential for mitochondrial biogenesis              | ITSKC#SGK                | mitochondrial matrix        | 1,2   |
| NUP82 | Subunit of the nuclear pore complex (NPC),                  | ACISPC#ERIIPSADR         | nuclear pore                | 2     |
| PDC1  | pyruvate decarboxylase                                      | VKDAKNPVILADAC#CSR       | cytoplasm\nucleus           | 1,2,3 |
| PDC1  | pyruvate decarboxylase                                      | DIATAPAEIDRC#IR          | cytoplasm\nucleus           | 1,2,3 |
| PDI1  | formation and isomerization of disulfide bonds              | FFAPWC#GHC#K             | endoplasmic reticulum lumen | 1,3,4 |

|              |                                                         |                           |                                |         |
|--------------|---------------------------------------------------------|---------------------------|--------------------------------|---------|
| PDI1         | formation and isomerization of disulfide bonds          | QIDC#TENQDLC#MEHNIPGFPSLK | cytoplasm                      | 1,3,4   |
| PDX3         | pyridoxine (pyridoxiamine) phosphate oxidase            | KDAEDIPC#PDY              | N\A                            | 3       |
| PET191       | Protein required for assembly of cytochrome c oxidase   | YDQQYENLC#K               | mitochondrial inner membrane   | 2       |
| PEX19        | 40 kDa farnesylated protein associated with peroxisomes | VPHQQMEQGC#SSLK           | cytoplasm                      | 1,2     |
| PFK1         | phosphofructokinase activity                            | QDSC#YGVAFR               | cytoplasm                      | 1,2,3,4 |
| PFK1         | phosphofructokinase activity                            | C#GGDGSALTGADLF           | cytoplasm                      | 1,2,3,4 |
| PHO11/3/5/12 | acid phosphatase activity                               | VAGTDFLKVC#               | extracellular                  | 1,3,4   |
| PHO11/3/5/12 | acid phosphatase activity                               | VINDAVVPIETC#             | extracellular                  | 3       |
| PMI40        | mannose-6-phosphate isomerase activity                  | TDFEGFC#GFKPL             | cytoplasm\ nucleus             | 1,3,4   |
| POL2         | DNA polymerase II                                       | AAPESIFSC#VRC#HK          | epsilon DNA polymerase complex | 1       |
| PRO2         | glutamate-5-semialdehyde dehydrogenase activity         | HADGIC#SIYLDEADLIKAK      | cytoplasm\nucleas              | 1,2,3   |
| PRO2         | glutamate-5-semialdehyde dehydrogenase activity         | LTEAIQC#K                 | cytoplasm\nucleas              | 1,2,3   |
| PRX1         | Mitochondrial peroxiredoxin                             | SHPADFTPVC#TTEVSAF        | mitochondrion                  | 3       |



|          |                                                        |                         |                                   |         |
|----------|--------------------------------------------------------|-------------------------|-----------------------------------|---------|
| PSA1     | mannose-1-phosphate guanylyltransferase                | STIVGWNSTVGQWC#R        | cytoplasm                         | 1,2,3,4 |
| PSA1     | mannose-1-phosphate guanylyltransferase                | NSDVIC#EYPFKEL          | cytoplasm                         | 1,2,3,4 |
| PSA1     | mannose-1-phosphate guanylyltransferase activity       | SVVLC#NSTIK             | cytoplasm                         | 1,2,3,4 |
| PYC1/2   | converts pyruvate to oxaloacetate                      | KLTC#RPGLELEPFDEK       | cytoplasm                         | 1,2     |
| QNS1     | Glutamine-dependent NAD Synthetase                     | YDC#SSADINPIGGISK       | cytoplasm\nucleas                 | 2       |
| QNS1     | Glutamine-dependent NAD Synthetase                     | FDPTVC#PTK              | cytoplasm\nucleas                 | 2       |
| RGR1     | RNA polymerase II transcription mediator activity      | TTNMNVNNC#IWALK         | mediator complex                  | 1       |
| RPL10    | Protein component of the large (60S) ribosomal subunit | ATVDEFPLC#VH            | cytosolic large ribosomal subunit | 4       |
| RPL11    | Protein component of the large (60S) ribosomal subunit | C#KGTVGNSHK             | cytosolic large ribosomal subunit | 4       |
| RPL12A/B | Protein component of the large (60S) ribosomal subunit | TLASVTKEILGTAQSVGC#RVDF | cytosolic large ribosomal subunit | 1,3     |
| RPL15A   | Protein component of the large (60S) ribosomal subunit | YNWIC#DPVHK             | cytosolic large ribosomal subunit | 1       |
| RPL23A/B | Protein component of the large (60S) ribosomal subunit | TGPVGKEC#ADLWPR         | cytosolic large ribosomal subunit | 1,3     |
| RPL3     | Protein component of the large (60S)                   | GC#IPGNR                | cytosolic large ribosomal subunit | 2       |

|          |                                                                                |                      |                                   |       |
|----------|--------------------------------------------------------------------------------|----------------------|-----------------------------------|-------|
| RPL34A/B | Protein component of the large (60S) ribosomal subunit                         | C#ANCVK              | cytosolic large ribosomal subunit | 2     |
| RPL37B   | Protein component of the large (60S)                                           | TC#SSCGYPSAK         | cytosolic large ribosomal subunit | 1,2   |
| RPL40A/B | ribosomal chaperone activity                                                   | C#GHTNQLRPK          | cytosolic large ribosomal subunit | 2     |
| RPL40A/B | ribosomal chaperone activity                                                   | ATNC#R               | cytosolic large ribosomal subunit | 2     |
| RPL4A/B  | N-terminally acetylated protein component of the large (60S) ribosomal subunit | SGQGAFGNMC#R         | cytosolic large ribosomal subunit | 1,2,4 |
| RPS0A/B  | Protein component of the small (40S) ribosomal subunit                         | TDLDSPSEFVDVAIPC#NNR | cytosolic small ribosomal subunit | 1,4   |
| RPS11A/B | Protein component of the small (40S) ribosomal subunit                         | VQVGDIVTVGQC#RPISK   | cytosolic small ribosomal subunit | 1     |
| RPS11A/B | 40S ribosomal protein S11 (S18) (YS12) (RP41).                                 | C#PFTGLVSIR          | cytosolic small ribosomal subunit | 1     |
| RPS17A/B | Ribosomal protein 51 (rp51) of the small (40s) subunit                         | LC#DEIATIQSK         | cytosolic small ribosomal         | 1     |
| RPS2     | component of the small (40S) subunit                                           | C#GSVTVR             | cytosolic large ribosomal subunit | 1     |
| RPS21A/B | Protein component of the small (40S) ribosomal subunit                         | KC#SATNR             | cytosolic small ribosomal subunit | 2,3,4 |

|           |                                                                                        |                            |                                              |         |
|-----------|----------------------------------------------------------------------------------------|----------------------------|----------------------------------------------|---------|
| RPS22A/B  | Protein component of the small (40S) ribosomal subunit                                 | C#GVISPR                   | cytosolic small ribosomal subunit            | 1       |
| RPS27     | Protein component of the small (40S) ribosomal subunit                                 | C#TPTGGKAK                 | cytosolic small ribosomal subunit            | 3       |
| RPS31     | Fusion protein that is cleaved to yield a ribosomal protein of the small (40S) subunit | EC#SNPTCGAGVFLANHK         | cytoplasm                                    | 1       |
| RPS8A/B   | Protein component of the small (40S) ribosomal subunit                                 | C#DGYILEGEELAFYLRR         | cytosolic small ribosomal subunit            | 1,3     |
| SAM4      | AdoMet-homocysteine methyltransferase                                                  | IIGGCC#R                   | cytoplasm\nucleus                            | 1       |
| SBP1      | single stranded nucleic acid binding protein                                           | NVAHEC#TEDDLKQL            | nucleus                                      | 3       |
| SHE3      | mRNA binding                                                                           | NSSAIEQSC#SEK              | cytoplasm                                    | 2       |
| SHM2      | serine hydroxymethyltransferase                                                        | VLVAGTSAYC#R               | cytoplasm                                    | 1       |
| SHP1      | Putative regulator of Glc7p (protein phosphatase I),                                   | AINTEHVGGLC#PKPGSSQGSNEYLK | cytoplasm\ nucleus                           | 2       |
| SOD1      | Cu, Zn superoxide dismutase                                                            | TGNAGRPAC#GVIGLTN          | cytoplasm\mitochondrial                      | 2,3,4   |
| SOD1      | Cu, Zn superoxide dismutase                                                            | EFGDATNGC#VSAGPHFNPFKK     | cytoplasm\ mitochondrial intermembrane space | 2,3,4   |
| SSA1      | Stress-Seventy Subfamily B;                                                            | FEELC#ADLFR                | cytoplasm                                    | 1,2,3,4 |
| SSB1/SSB2 | Stress-Seventy Subfamily B;                                                            | VNC#KENTLLGEFDLK           | cytoplasm                                    | 1,2,3,4 |
| SSE1      | HSP70 family member                                                                    | C#DPSGLHTIEEAYTIE          | cytoplasm                                    | 3       |

|          |                                                                                                             |                           |                                        |         |
|----------|-------------------------------------------------------------------------------------------------------------|---------------------------|----------------------------------------|---------|
| STI1     | Heat shock protein                                                                                          | FSDALNDANEC#VK            | cytoplasm                              | 3       |
| STP1     | transcription factor, activated by proteolytic processing in response to signals from the SPS sensor system | QADSC#INCK                | nucleus                                | 1       |
| TDH3/1/2 | Glyceraldehyde-3-phosphate dehydrogenase 3                                                                  | SNASC#TTNC#               | cytoplasm                              | 1,3,4   |
| TEF2     | translation elongation factor eEF-1 alpha-A chain                                                           | NHPGQISAGYSPVLDC#HTAHIA   | cytoplasm                              | 1,2,3,4 |
| TEF2     | translation elongation factor eEF-1 alpha-A chain                                                           | C#RFDELLEKNDR             | cytoplasm                              | 1,2,3,4 |
| TEF2     | translation elongation factor eEF-1 alpha-A chain                                                           | FVPSKPMC#VEAFSEYPPLGR     | cytoplasm                              | 1,2,3,4 |
| TEF2     | translation elongation factor eEF-1 alpha-A chain                                                           | C#GGIDKR                  | cytoplasm                              | 1,2,3,4 |
| TEF2     | translation elongation factor eEF-1 alpha-A chain                                                           | GNVC#GDAK                 | cytoplasm                              | 1,2,3,4 |
| TFP1     | Encodes a protein with three regions (ABC)                                                                  | LNLC#AEYK                 | hydrogen-transporting ATPase V1 domain | 2       |
| TFP1     | hydrogen-transporting ATPase activity, rotational mechanism                                                 | VLDALFPC#VQGGTTCIPGAFGCGK | hydrogen-transporting ATPase V1 domain | 1,2     |
| THR4     | threonine synthase                                                                                          | SVTGTFDNC#QDIVK           | cytoplasm\nucleus                      | 1,3     |
| TPM2     | Actin-binding protein                                                                                       | KC#EEFQSK                 | actin cable                            | 2       |

|           |                                                                   |                                 |                                 |         |
|-----------|-------------------------------------------------------------------|---------------------------------|---------------------------------|---------|
| TRR1      | Thioredoxin reductase                                             | GISAC#AVC#DGAVPIFR              | cytoplasm                       | 1,3     |
| TRX1/3    | thioredoxin                                                       | C#GPC#KM                        | cytoplasm                       | 1,2,3,4 |
| TRX2      | thioredoxin                                                       | SASEYDSALASGDKLVVVDFFATWC#GPC#K | cytoplasm                       | 1,4     |
| TSA1      | Thiol-specific antioxidant protein                                | AFTFVC#PTEIIAFSEAAK             | cytoplasm                       | 1,2,3,4 |
| TSA1      | Thiol-specific antioxidant protein                                | AFIPLAFTFVC#PTEIIAFSEAAK        | cytoplasm                       | 1,2,3,4 |
| TTR1      | glutaredoxin                                                      | TYC#PYC#K                       | cytoplasm                       | 2,4     |
| VAS1      | mitochondrial and cytoplasmic valyl-tRNA synthetase               | SSEAEYFHWLGNIQDWC#ISR           | cytoplasm\ mitochondrion        | 1       |
| VPS15     | myristoylated protein kinase involved in vacuolar protein sorting | HGAVSSIC#IDEECCVLILGTR          | Golgi membrane                  | 1       |
| YAL049C   | contains Dienelactone hydrolase family                            | C#C#FEGVCHDGTK                  | cytoplasm                       | 2       |
| YAR1      | 200-amino-acid protein with two ANK repeat motifs                 | C#DEYEADPFIR                    | cytoplasm                       | 3       |
| YBR267W   | Hypothetical ORF,zinc finger                                      | IGLGNIC#IVCNYQGR                | cytoplasm                       | 1       |
| YDR051C   | contains Phosphoglycerate mutase domain                           | WTDC#EGDLTT                     | cytoplasm\nucleus               | 2       |
| YDR051C   | contains Phosphoglycerate mutase domain                           | IC#EDMR                         | cytoplasm\nucleus               | 2       |
| YDR365W-A | TyA Gag protein                                                   | TEEC#EK                         | retrotransposon<br>nucleocapsid | 2       |
| YJR119C   | Hypothetical ORF                                                  | TILC#DSCDKPFHIYCLSPPLER         | cytoplasm\nucleus               | 2       |

|         |                                               |                      |                                     |     |
|---------|-----------------------------------------------|----------------------|-------------------------------------|-----|
| YKL215C | molecular_function unknown                    | NGERC#AFITTK         | cytoplasm                           | 2   |
| YLR257W | Hypothetical ORF                              | GSTPC#LIGDSIR        | cytoplasm                           | 1,2 |
| YMR031C | contains Chromosome segregation ATPase domain | C#EQDITEAR           | cytoplasm                           | 2   |
| YNL134C | alcohol dehydrogenase (NADP+) activity        | IGPQGALLGC#DAAGQIVK  | cytoplasm                           | 1   |
| YNL247W | Protein required for cell viability           | C#QPWNK              | cytoplasm\colocalizes with ribosome | 1   |
| YOR220W | molecular_function unknown                    | C#LFASKPLGLTIDTSTR   | cytoplasm                           | 2   |
| YSA1    | phosphoribosyl-ATP diphosphatase activity     | VC#IEMPAGLIDAGEDIDTA | cytoplasm\nucleus                   | 3   |
| ZPR1    | binds to translation elongation factor eEF-1  | NC#EIQPASQIQEK       | cytoplasm\nucleus                   | 2   |
| ZTA1    | quinone reductase                             | C#TIPEQQK            | cytoplasm                           | 2   |

# detected reactive Cys; 1 = BIAM reactive Cys, regulated (reducible) by TCEP; 2 = BIAM reactive Cys, not regulated by reducing agents; 3 = BIAM reactive Cys, regulated by TRX1; 4 = BIAM reactive Cys, regulated by TTR1
